# Supplementary material
Source: PubMed Central journal article supplement (PMC4443099)
Supplement: ijcem0008-3700-f4.pdf [file ijcem0008-3700-f4.pdf]

# Plasma MicroRNAs for GC

## hsa-miR-223:

|                                | predicted consequential pairing of target region (top) and miRNA (bottom) | seed match | site-type contribution | 3' pairing contribution | local AU contribution | position contribution | TA contribution | SPS contribution | context+ score | context+ score percentile | conserved branch length | P <sub>CT</sub> |
|--------------------------------|---------------------------------------------------------------------------|------------|------------------------|-------------------------|-----------------------|-----------------------|-----------------|------------------|----------------|---------------------------|-------------------------|-----------------|
| Position 439-446 of SP3 3' UTR | 5' ... AUUUUUUUUUUUGCAUAAACUGACA...<br>3' ACCCCAAAACUGU-UUGACUGU          | 8mer       | -0.247                 | -0.029                  | -0.073                | -0.003                | -0.016          | 0.017            | -0.35          | 97                        | 4.124                   | 0.47            |

|                                  | predicted consequential pairing of target region (top) and miRNA (bottom) | seed match | site-type contribution | 3' pairing contribution | local AU contribution | position contribution | TA contribution | SPS contribution | context+ score | context+ score percentile | conserved branch length | P <sub>CT</sub> |
|----------------------------------|---------------------------------------------------------------------------|------------|------------------------|-------------------------|-----------------------|-----------------------|-----------------|------------------|----------------|---------------------------|-------------------------|-----------------|
| Position 265-272 of FBXO8 3' UTR | 5' ... UGUUAAACGAAGAUAAACUGACA...<br>3' ACCCCAAAACUGU-UUGACUGU            | 8mer       | -0.247                 | 0.003                   | -0.080                | -0.047                | -0.016          | 0.017            | -0.37          | 97                        | 1.742                   | 0.47            |

|                                 | predicted consequential pairing of target region (top) and miRNA (bottom) | seed match | site-type contribution | 3' pairing contribution | local AU contribution | position contribution | TA contribution | SPS contribution | context+ score | context+ score percentile | conserved branch length | P <sub>CT</sub> |
|---------------------------------|---------------------------------------------------------------------------|------------|------------------------|-------------------------|-----------------------|-----------------------|-----------------|------------------|----------------|---------------------------|-------------------------|-----------------|
| Position 95-101 of SCN3A 3' UTR | 5' ... AGGAGGUCCAGGCCAAACUGACU...<br>3' ACCCCAAAACUGU-UUGACUGU            | 7mer-8     | -0.120                 | 0.003                   | -0.021                | -0.048                | -0.011          | 0.014            | -0.18          | 79                        | 1.936                   | 0.48            |

## hsa-miR-19b-2\*

|                                 | predicted consequential pairing of target region (top) and miRNA (bottom) | seed match | site-type contribution | 3' pairing contribution | local AU contribution | position contribution | TA contribution | SPS contribution | context+ score | context+ score percentile | conserved branch length | P <sub>CT</sub> |
|---------------------------------|---------------------------------------------------------------------------|------------|------------------------|-------------------------|-----------------------|-----------------------|-----------------|------------------|----------------|---------------------------|-------------------------|-----------------|
| Position 167-173 of NME1 3' UTR | 5' ... UGUUAGAACAGUGAUUUUGACU...<br>3' AGUCAAAAACGUACCU-AAACGUGU          | 7mer-8     | -0.120                 | -0.035                  | -0.056                | -0.050                | 0.004           | 0.019            | -0.24          | 88                        | 1.655                   | 0.50            |

|                                    | predicted consequential pairing of target region (top) and miRNA (bottom) | seed match | site-type contribution | 3' pairing contribution | local AU contribution | position contribution | TA contribution | SPS contribution | context+ score | context+ score percentile | conserved branch length | P <sub>CT</sub> |
|------------------------------------|---------------------------------------------------------------------------|------------|------------------------|-------------------------|-----------------------|-----------------------|-----------------|------------------|----------------|---------------------------|-------------------------|-----------------|
| Position 1207-1214 of SCN4B 3' UTR | 5' ... UUCUCCAGAGCGUUGUUGACACA...<br>3' AGUCAAAAACGUACCU-AAACGUGU         | 8mer       | -0.247                 | 0.003                   | 0.119                 | 0.191                 | 0.008           | 0.025            | > -0.03        | 1                         | 1.669                   | 0.70            |
| Position 1207-1214 of SCN4B 3' UTR | 5' ... UUCUCCAGAGCGUUGUUGACACA...<br>3' AGUCAAAAACGUACCU-AAACGUGU         | 8mer       | -0.247                 | 0.003                   | 0.119                 | 0.191                 | 0.008           | 0.025            | > -0.03        | 1                         | 1.669                   | 0.70            |

|                                   | predicted consequential pairing of target region (top) and miRNA (bottom) | seed match | site-type contribution | 3' pairing contribution | local AU contribution | position contribution | TA contribution | SPS contribution | context+ score | context+ score percentile | conserved branch length | P <sub>CT</sub> |
|-----------------------------------|---------------------------------------------------------------------------|------------|------------------------|-------------------------|-----------------------|-----------------------|-----------------|------------------|----------------|---------------------------|-------------------------|-----------------|
| Position 141-148 of RHEBL1 3' UTR | 5' ... UGUGGCAUCCUUAUG--UUUGCACA...<br>3' AGUCAAAAACGUACCU-AAACGUGU       | 8mer       | -0.247                 | -0.018                  | 0.078                 | -0.079                | 0.008           | 0.025            | -0.23          | 87                        | 1.691                   | 0.71            |
| Position 141-148 of RHEBL1 3' UTR | 5' ... UGUGGCAUCCUUAUG--UUUGCACA...<br>3' AGUCAAAAACGUACCU-AAACGUGU       | 8mer       | -0.247                 | -0.008                  | 0.078                 | -0.079                | 0.008           | 0.025            | -0.22          | 85                        | 1.691                   | 0.71            |

## hsa-miR-194\*

|                                 | predicted consequential pairing of target region (top) and miRNA (bottom) | seed match | site-type contribution | 3' pairing contribution | local AU contribution | position contribution | TA contribution | SPS contribution | context+ score | context+ score percentile | conserved branch length | P <sub>CT</sub> |
|---------------------------------|---------------------------------------------------------------------------|------------|------------------------|-------------------------|-----------------------|-----------------------|-----------------|------------------|----------------|---------------------------|-------------------------|-----------------|
| Position 273-280 of CHD4 3' UTR | 5' ... UCCCCACUGUAAAGCCUGUUACA...<br>3' AGGUGUACCUCAAACGACAAGU            | 8mer       | -0.247                 | 0.003                   | 0.094                 | -0.045                | 0.001           | 0.038            | -0.16          | 81                        | 1.583                   | 0.49            |

|                                   | predicted consequential pairing of target region (top) and miRNA (bottom) | seed match | site-type contribution | 3' pairing contribution | local AU contribution | position contribution | TA contribution | SPS contribution | context+ score | context+ score percentile | conserved branch length | P <sub>CT</sub> |
|-----------------------------------|---------------------------------------------------------------------------|------------|------------------------|-------------------------|-----------------------|-----------------------|-----------------|------------------|----------------|---------------------------|-------------------------|-----------------|
| Position 38-45 of ARHGAP21 3' UTR | 5' ... CAAGUAAAACAAACUUCUUAACA...<br>3' AGGUGUACCUCAAACGACAAGU            | 8mer       | -0.247                 | 0.034                   | -0.027                | -0.105                | 0.001           | 0.038            | -0.31          | 97                        | 1.065                   | 0.21            |

## hsa-miR-141

|                                    | predicted consequential pairing of target region (top) and miRNA (bottom) | seed match | site-type contribution | 3' pairing contribution | local AU contribution | position contribution | TA contribution | SPS contribution | context+ score | context+ score percentile | conserved branch length | P <sub>CT</sub> |
|------------------------------------|---------------------------------------------------------------------------|------------|------------------------|-------------------------|-----------------------|-----------------------|-----------------|------------------|----------------|---------------------------|-------------------------|-----------------|
| Position 933-939 of ARPC5 3' UTR   | 5' ... CCCCUGAAAAGUCUUCAGUGUUC...<br>3' UGUAGCAAUGGUCUGUCACAAU            | 7mer-8     | -0.120                 | 0.003                   | -0.038                | -0.006                | 0.015           | 0.020            | -0.13          | 74                        | 1.420                   | 0.22            |
| Position 933-939 of ARPC5 3' UTR   | 5' ... CCCCUGAAAAGUCUUCAGUGUUC...<br>3' GGUAGAAAUGGUCUGUCACAAU            | 7mer-8     | -0.120                 | 0.012                   | -0.038                | -0.006                | 0.015           | 0.020            | -0.12          | 71                        | 1.420                   | 0.22            |
| Position 1009-1015 of ARPC5 3' UTR | 5' ... UUCUGUGUUUUAGCU--CAGUGUUU...<br>3' GGUAGAAAUGGUCUGUCACAAU          | 7mer-8     | -0.120                 | -0.025                  | -0.067                | -0.016                | 0.015           | 0.020            | -0.19          | 87                        | 1.503                   | 0.24            |
| Position 1009-1015 of ARPC5 3' UTR | 5' ... UUCUGUGUUUUAGCU--CAGUGUUU...<br>3' UGUAGCAAUGGUCUGUCACAAU          | 7mer-8     | -0.120                 | -0.016                  | -0.067                | -0.016                | 0.015           | 0.020            | -0.18          | 86                        | 1.503                   | 0.24            |

|                                   | predicted consequential pairing of target region (top) and miRNA (bottom) | seed match | site-type contribution | 3' pairing contribution | local AU contribution | position contribution | TA contribution | SPS contribution | context+ score | context+ score percentile | conserved branch length | P <sub>CT</sub> |
|-----------------------------------|---------------------------------------------------------------------------|------------|------------------------|-------------------------|-----------------------|-----------------------|-----------------|------------------|----------------|---------------------------|-------------------------|-----------------|
| Position 1617-1624 of CHD9 3' UTR | 5' ... CCUUUUUAGAGACAGUGUUA...<br>3' GGUAGAAAUGGUCUGUCACAAU               | 8mer       | -0.247                 | -0.018                  | -0.069                | 0.134                 | 0.026           | 0.026            | -0.15          | 79                        | 1.095                   | 0.26            |
| Position 1617-1624 of CHD9 3' UTR | 5' ... CCUUUUUAGAGACAGUGUUA...<br>3' UGUAGCAAUGGUCUGUCACAAU               | 8mer       | -0.247                 | -0.018                  | -0.069                | 0.134                 | 0.026           | 0.026            | -0.15          | 79                        | 1.095                   | 0.26            |

# Plasma MicroRNAs for GC

|                                 | predicted consequential pairing of target region (top) and miRNA (bottom)         | seed match | site-type contribution | 3' pairing contribution | local AU contribution | position contribution | TA contribution | SPS contribution | context+ score | context+ score percentile | conserved branch length | P <sub>CT</sub> |
|---------------------------------|-----------------------------------------------------------------------------------|------------|------------------------|-------------------------|-----------------------|-----------------------|-----------------|------------------|----------------|---------------------------|-------------------------|-----------------|
| Position 391-397 of LMO3 3' UTR | 5' ... UGCAUUUAGUACAADCAGUGUUU...<br>             <br>3' GGUAGAAAUGGUCU--GUCACAAU | 7mer-m8    | -0.120                 | -0.025                  | -0.112                | -0.006                | 0.015           | 0.020            | -0.23          | 92                        | 2.073                   | 0.50            |
| hsa-miR-141                     |                                                                                   |            |                        |                         |                       |                       |                 |                  |                |                           |                         |                 |
| Position 391-397 of LMO3 3' UTR | 5' ... UGCAUUUAGUACAAD-CAGUGUUU...<br>             <br>3' UGUAGCAAUGGUCUCACAAU    | 7mer-m8    | -0.120                 | -0.016                  | -0.112                | -0.006                | 0.015           | 0.020            | -0.22          | 92                        | 2.073                   | 0.50            |
| hsa-miR-200a                    |                                                                                   |            |                        |                         |                       |                       |                 |                  |                |                           |                         |                 |
| Position 608-614 of LMO3 3' UTR | 5' ... UGAGUUAGAGUCUADCAGUGUUC...<br>             <br>3' UGUAGCAAUGGUCU--GUCACAAU | 7mer-m8    | -0.120                 | -0.016                  | -0.055                | 0.024                 | 0.015           | 0.020            | -0.13          | 76                        | 1.459                   | 0.23            |
| hsa-miR-200a                    |                                                                                   |            |                        |                         |                       |                       |                 |                  |                |                           |                         |                 |
| Position 608-614 of LMO3 3' UTR | 5' ... UGAGUUAGAGUCUADCAGUGUUC...<br>             <br>3' GGUAGAAAUGGUCUCACAAU     | 7mer-m8    | -0.120                 | -0.007                  | -0.055                | 0.024                 | 0.015           | 0.020            | -0.12          | 73                        | 1.459                   | 0.23            |
| hsa-miR-141                     |                                                                                   |            |                        |                         |                       |                       |                 |                  |                |                           |                         |                 |

## hsa-miR-1233

|                                   | predicted consequential pairing of target region (top) and miRNA (bottom) | seed match | site-type contribution | 3' pairing contribution | local AU contribution | position contribution | TA contribution | SPS contribution | context+ score | context+ score percentile | conserved branch length | P <sub>CT</sub> |
|-----------------------------------|---------------------------------------------------------------------------|------------|------------------------|-------------------------|-----------------------|-----------------------|-----------------|------------------|----------------|---------------------------|-------------------------|-----------------|
| Position 139-146 of DLGAP4 3' UTR | 5' ... AAAUUGACGCCAUACAGGGCUCA...<br>     <br>3' GAGGCCUCCUGUCCCGAGU      | 8mer       | -0.247                 | 0.013                   | -0.008                | -0.079                | 0.000           | -0.146           | -0.47          | 99                        | 2.540                   | N/A             |
| hsa-miR-1233                      |                                                                           |            |                        |                         |                       |                       |                 |                  |                |                           |                         |                 |

|                                  | predicted consequential pairing of target region (top) and miRNA (bottom) | seed match | site-type contribution | 3' pairing contribution | local AU contribution | position contribution | TA contribution | SPS contribution | context+ score | context+ score percentile | conserved branch length | P <sub>CT</sub> |
|----------------------------------|---------------------------------------------------------------------------|------------|------------------------|-------------------------|-----------------------|-----------------------|-----------------|------------------|----------------|---------------------------|-------------------------|-----------------|
| Position 111-118 of FMNL2 3' UTR | 5' ... ACAAAAUAUUCUUAAGGGCUCA...<br>     <br>3' GAGGCCUCCUGUCCCGAGU       | 8mer       | -0.247                 | 0.045                   | -0.066                | -0.086                | 0.000           | -0.146           | -0.50          | 99                        | 1.386                   | N/A             |
| hsa-miR-1233                     |                                                                           |            |                        |                         |                       |                       |                 |                  |                |                           |                         |                 |

|                                     | predicted consequential pairing of target region (top) and miRNA (bottom) | seed match | site-type contribution | 3' pairing contribution | local AU contribution | position contribution | TA contribution | SPS contribution | context+ score | context+ score percentile | conserved branch length | P <sub>CT</sub> |
|-------------------------------------|---------------------------------------------------------------------------|------------|------------------------|-------------------------|-----------------------|-----------------------|-----------------|------------------|----------------|---------------------------|-------------------------|-----------------|
| Position 1311-1317 of LRRC57 3' UTR | 5' ... GUGCCUUAUUGGUAAGGGCUUC...<br>     <br>3' GAGGCCUCCUGUCCCGAGU       | 7mer-m8    | -0.120                 | 0.003                   | 0.001                 | -0.027                | -0.001          | -0.085           | -0.23          | 84                        | 1.562                   | N/A             |
| hsa-miR-1233                        |                                                                           |            |                        |                         |                       |                       |                 |                  |                |                           |                         |                 |

|                                  | predicted consequential pairing of target region (top) and miRNA (bottom) | seed match | site-type contribution | 3' pairing contribution | local AU contribution | position contribution | TA contribution | SPS contribution | context+ score | context+ score percentile | conserved branch length | P <sub>CT</sub> |
|----------------------------------|---------------------------------------------------------------------------|------------|------------------------|-------------------------|-----------------------|-----------------------|-----------------|------------------|----------------|---------------------------|-------------------------|-----------------|
| Position 816-823 of PDRG1 3' UTR | 5' ... CUUAUGUUCUAUAAGGGCUCA...<br>     <br>3' GAGGCCUCCUGUCCCGAGU        | 8mer       | -0.247                 | 0.024                   | -0.093                | -0.107                | 0.000           | -0.146           | -0.57          | 99                        | 1.308                   | N/A             |
| hsa-miR-1233                     |                                                                           |            |                        |                         |                       |                       |                 |                  |                |                           |                         |                 |

|                                  | predicted consequential pairing of target region (top) and miRNA (bottom) | seed match | site-type contribution | 3' pairing contribution | local AU contribution | position contribution | TA contribution | SPS contribution | context+ score | context+ score percentile | conserved branch length | P <sub>CT</sub> |
|----------------------------------|---------------------------------------------------------------------------|------------|------------------------|-------------------------|-----------------------|-----------------------|-----------------|------------------|----------------|---------------------------|-------------------------|-----------------|
| Position 895-901 of STIM1 3' UTR | 5' ... CCACAGCCAGAUACAGGGCUUC...<br>     <br>3' GAGGCCUCCUGUCCCGAGU       | 7mer-m8    | -0.120                 | 0.003                   | 0.009                 | 0.011                 | -0.001          | -0.085           | -0.18          | 71                        | 1.508                   | N/A             |
| hsa-miR-1233                     |                                                                           |            |                        |                         |                       |                       |                 |                  |                |                           |                         |                 |
